# Supplementary material for: LTBP2 Serves as a Prognostic Biomarker and Correlated with the Immune Infiltration in Stomach and Colon Cancer
Source: Research Square preprint supplement (doi:10.21203/rs.3.rs-462150/v1), 2021-05-07
Supplement: Supplementary file 1 [file 6d22ea83968c6e7aa308c37d.docx]

**Supplementary Table 5**. Gene sets enriched in the high LTBP2 expression phenotype in gastric cancer.

| Gene set name | NES | NOM *p*-value | FDR q-value |
| --- | --- | --- | --- |
| KEGG_HEDGEHOG_SIGNALING_PATHWAY | 2.4507422 | 0 | 0 |
| KEGG_ECM RECEPTOR INTERACTION | 2.436408 | 0 | 0 |
| KEGG_CYTOKINE CYTOKINE RECEPTOR INTERACTION | 2.260075 | 0 | 0.0000582887 |
| KEGG_JAK_STAT_SIGNALING_PATHWAY | 2.2564 | 0 | 0.0000534313 |
| KEGG_MAPK SIGNALING PATHWAY | 2.1810308 | 0 | 0.0004569669 |
| KEGG_LEUKOCYTE_TRANSENDOTHELIAL_MIGRATION | 2.1599767 | 0 | 0.0004552483 |
| KEGG_TGF_BETA_SIGNALING_PATHWAY | 2.1397617 | 0 | 0.000505869 |
| KEGG_TOLL_LIKE_RECEPTOR_SIGNALING_PATHWAY | 1.9567368 | 0 | 0.006332219 |
| KEGG_WNT_SIGNALING_PATHWAY | 1.8602784 | 0 | 0.013279603 |
| KEGG_CHEMOKINE_SIGNALING_PATHWAY | 2.0120614 | 0.001949317 | 0.003320064 |
| KEGG_ENDOCYTOSIS | 1.7818451 | 0.002 | 0.021734355 |
| KEGG_T_CELL_RECEPTOR_SIGNALING_PATHWAY | 1.8777232 | 0.005859375 | 0.012292279 |
| KEGG_MTOR SIGNALING PATHWAY | 1.7279804 | 0.007782101 | 0.026063133 |
| KEGG_VEGF SIGNALING PATHWAY | 1.7494819 | 0.007920792 | 0.024957921 |
| KEGG_NATURAL_KILLER_CELL_MEDIATED_CYTOTOXICITY | 1.740714 | 0.015936255 | 0.02583157 |
| KEGG_NOTCH SIGNALING PATHWAY | 1.7453407 | 0.017509727 | 0.025368884 |
| KEGG_B_CELL_RECEPTOR_SIGNALING_PATHWAY | 1.6688175 | 0.046783626 | 0.03565233 |

NES，normalized enrichment score; NOM, nominal; FDR,false discovery rate.
